# Supplementary material for: LC-MS/MS Confirms That COX-1 Drives Vascular Prostacyclin Whilst Gene Expression Pattern Reveals Non-Vascular Sites of COX-2 Expression
Source: PubMed Central journal article supplement (PMC3711559; doi:10.1371/journal.pone.0069524), 2013-07-09

# Luciferase Activity (RLU/mg protein) x10<sup>4</sup>

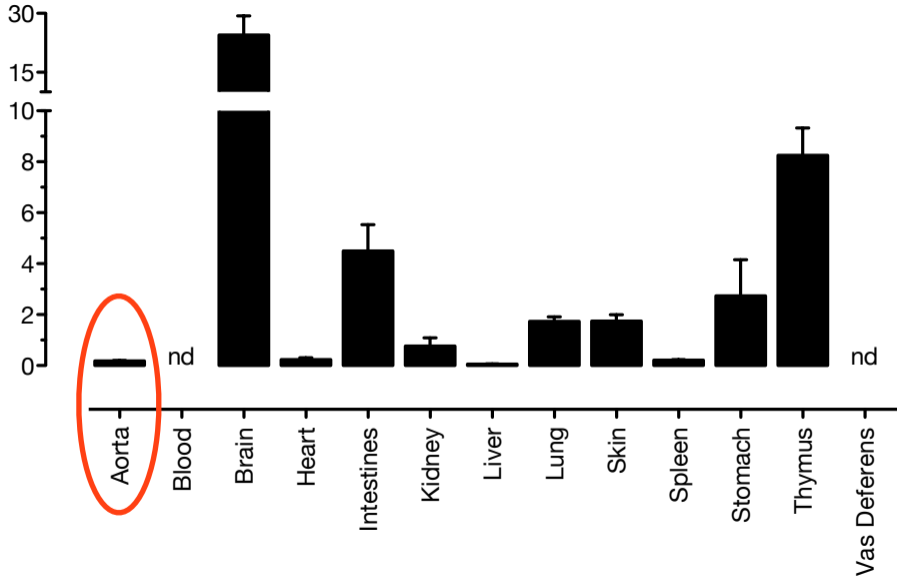

Supplement: pone.0069524.s001.pdf [file pone.0069524.s001.pdf]
