# Supplementary material for: LC-MS/MS Confirms That COX-1 Drives Vascular Prostacyclin Whilst Gene Expression Pattern Reveals Non-Vascular Sites of COX-2 Expression
Source: PubMed Central journal article supplement (PMC3711559; doi:10.1371/journal.pone.0069524), 2013-07-09

## A Wild-type

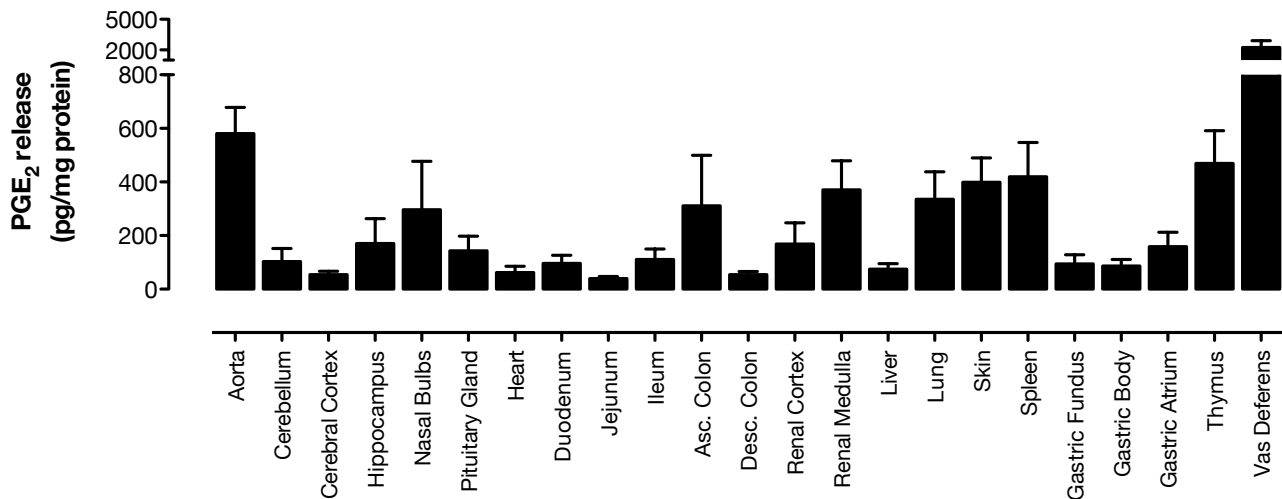

## B COX-2<sup>-/-</sup>

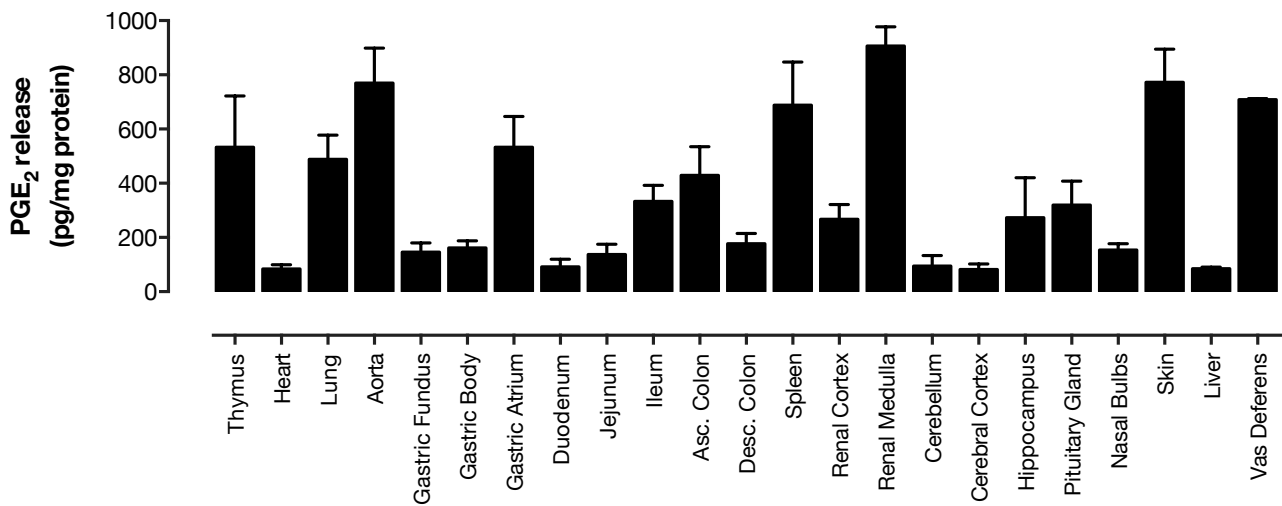

Supplement: pone.0069524.s002.pdf [file pone.0069524.s002.pdf]
